# Supplementary material for: A gender specific improved survival related to stromal miR-143 and miR-145 expression in non-small cell lung cancer
Source: PubMed Central journal article supplement (PMC5986811; doi:10.1038/s41598-018-26864-w), 2018-06-04
Supplement: 41598_2018_26864_MOESM1_ESM.pdf [file 41598_2018_26864_MOESM1_ESM.pdf]

## **A gender specific improved survival related to stromal miR-143 and miR-145 expression in non-small cell lung cancer**

Kaja Skjefstad, MD<sup>1\*</sup>  
Charles Johannessen, MSc<sup>1</sup>  
Thea Grindstad, MD<sup>1</sup>  
Thomas Kilvaer, MD, PhD<sup>2,3</sup>  
Erna-Elise Paulsen, MD, PhD<sup>2,3</sup>  
Mona Pedersen<sup>2</sup>  
Tom Donnem, MD, PhD<sup>2,3</sup>  
Sigve Andersen, MD, PhD<sup>2,3</sup>  
Roy Bremnes, MD, PhD<sup>2,3</sup>  
Elin Richardsen, MD, PhD<sup>1,4</sup>  
Samer Al-Saad, MD, PhD<sup>1,4</sup>  
Lill-Tove Busund, MD, PhD<sup>1,4</sup>

<sup>1</sup> Department of Medical Biology, UiT The Arctic University of Norway, Mailbox 6050 Langnes, N-9037 Tromsø, Norway

<sup>2</sup> Department of Clinical Medicine, UiT The Arctic University of Norway, Mailbox 6050 Langnes, N-9037 Tromsø, Norway

<sup>3</sup> Department of Oncology, University Hospital of North Norway, Mailbox 13, N-9038 Tromsø, Norway

<sup>4</sup> Department of Clinical Pathology, University Hospital of North Norway, Mailbox 46, N-9038 Tromsø, Norway

*E-mail addresses in order as listed above:* kaja.skjefstad@gmail.com, charles.johannessen@uit.no, theagrindstad@gmail.com, kilvaer@gmail.com, erna.e.paulsen@uit.no, mona.i.pedersen@uit.no, tom.donnem@uit.no, sigve.andersen@uit.no, roy.bremnes@uit.no, elin.richardsen@unn.no, sameralsaad@gmail.com, lill.tove.busund@unn.no

### **\* Corresponding author**

Kaja Konstane Skjefstad, MD  
Translational Cancer Research Group  
Department of Medical Biology  
UiT The Arctic University of Norway  
Mailbox 6050 Langnes  
9038 Tromsø, Norway  
Telephone: +47 48 14 04 06  
E-mail: kaja.skjefstad@gmail.com

**Supplementary Table 1**

Spearman rank correlations between mean scores of tumor epithelial (T-) and stromal (S-) miR-143 and miR-145 in primary tumor (PT) and metastatic lymph nodes (LN+) and other molecular markers

|                 | PT S-miR-143 | PT T-miR-143 | LN-miR-143 | PT S-miR-145 | PT T-miR-145 | LN-miR-145 |
|-----------------|--------------|--------------|------------|--------------|--------------|------------|
| S-AR            |              |              | 0.494***   |              |              |            |
| ER $\beta$ _cyt |              | 0.215***     |            |              |              |            |
| ER $\beta$ _nuc | -0.125*      |              |            |              | 0.212***     |            |
| S-PGR           |              |              | -0.336*    |              |              |            |
| T-PGR           |              |              | -0.453***  |              |              |            |
| T-PDGFA         |              |              | 0.287*     |              |              |            |
| S-bFGF          |              |              | 0.288*     |              |              |            |
| S-FGFR1         |              |              | 0.318*     |              |              |            |
| S-Notch4        |              |              | 0.289*     |              |              |            |
| T-Ang1          |              | 0.209***     |            |              |              |            |
| T-Tie2          |              |              |            |              | 0.223**      |            |
| T-MCT1          |              | 0.297***     |            |              |              |            |
| T-MCT4          |              |              | -0.306*    |              |              |            |
| T-Thro          |              |              |            |              | 0.212**      |            |
| T-B celle       |              |              |            |              |              | 0.312*     |
| T-pTEN          |              |              | -0.320*    |              |              |            |
| T-pHer          |              |              |            | 0.216***     |              |            |
| T-Her3          |              | 0.226***     |            |              |              | 0.296*     |
| S-vim           |              |              |            |              |              | -0.334*    |
| T-APK           |              |              |            |              | 0.215***     |            |
| tFC             |              |              |            |              | 0.232***     |            |
| T-Igfbp         |              |              |            |              |              | 0.298*     |
| S-Igf           |              |              | -0.268*    |              |              |            |
| pFC             |              |              |            |              | 0.299***     |            |
| pFN             |              |              | -0.290*    |              |              |            |
| MET_g           |              |              | -0.354*    |              |              |            |
| S-Ki67          |              |              | -0.285*    |              |              |            |

\* = p<0.05, \*\* = p<0.01, \*\*\* = p<0.001

# miR expression relative to the non-cancer cell line NL20

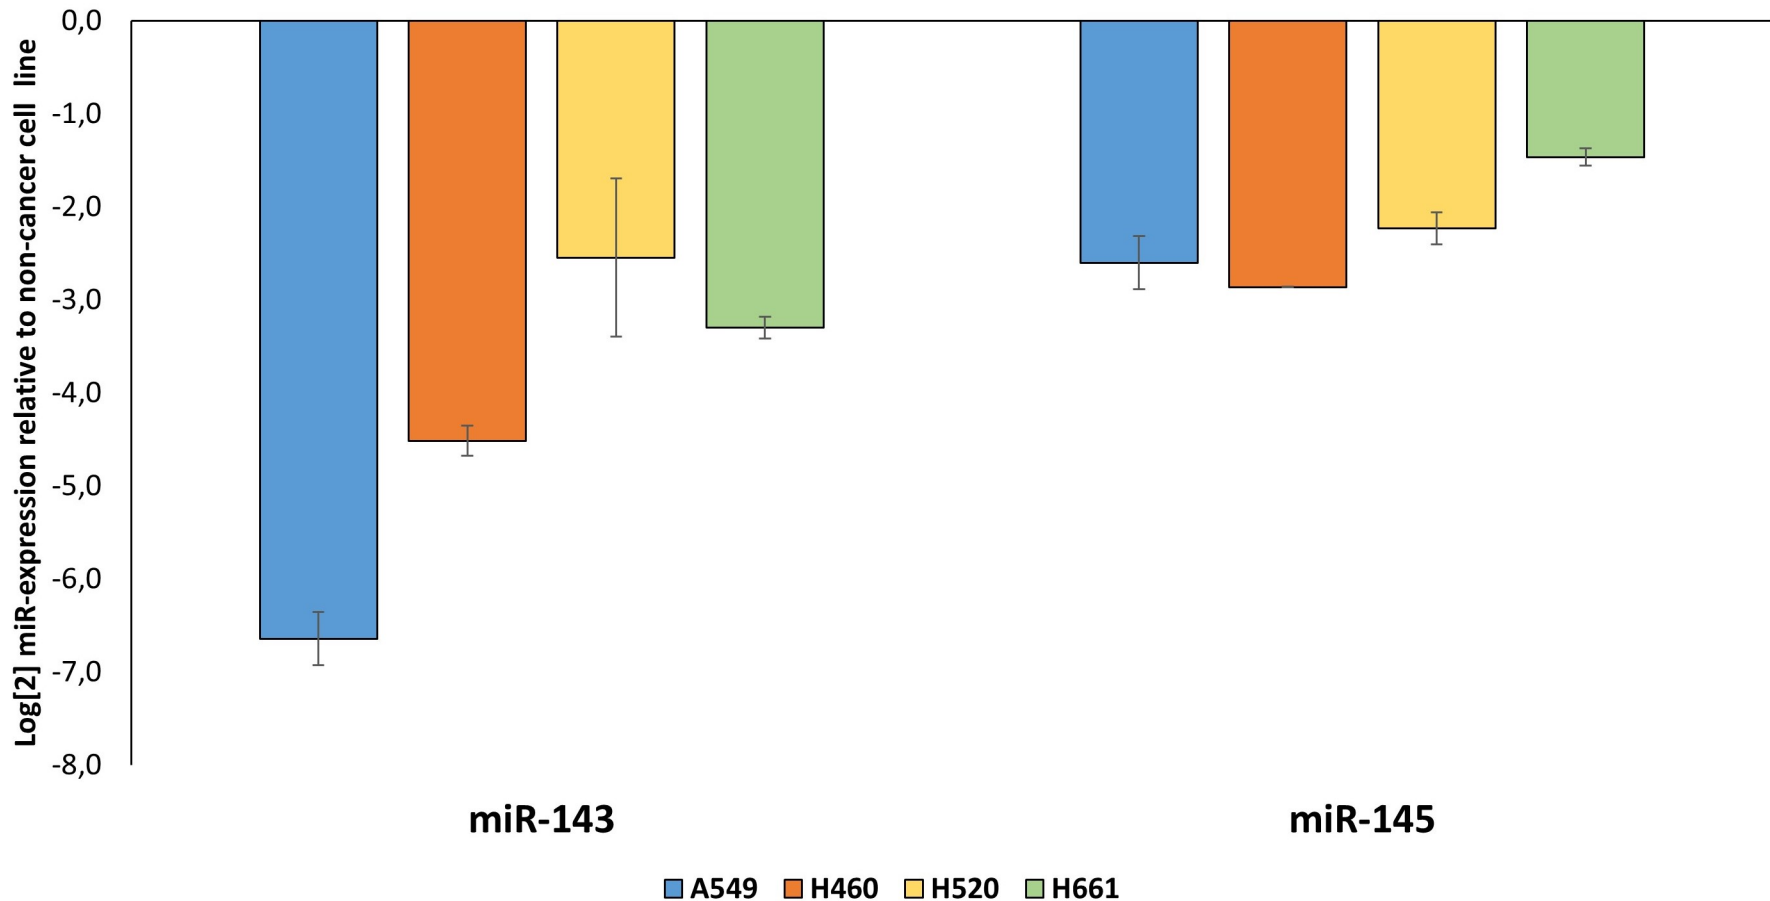

## **Legend to supplementary figure**

### **Supplementary figure 1**

Endogenous levels of miR-143 and miR-145 in the studied NSCLC cell lines were quantified by qPCR, relative to the non-cancerous lung cell line NL20. Both miR-143 and miR-145 were downregulated in all the selected cell lines, compared to NL20
